# Supplementary material for: Influence of Terrestrial Precipitation on the Variability of Extreme Sea Levels along the Coast of Bangladesh
Source: MDPI journal article supplement (doi:10.3390/w13202915), 2021-10-16
Supplement: s1 [file s1]

Archive with 1 entries (1 files):
- water-1411013-supplementary.pdf
